# Supplementary material for: Patients’ views on electronic patient information leaflets
Source: PubMed Central journal article supplement — Pharm Pract (Granada). 2016 Jun 15;14(2):702. doi: 10.18549/PharmPract.2016.02.702 (PMC4930857; doi:10.18549/pharmpract.2016.02.702), 2016-06-15
Supplement: pharmpract-14-702-suppl.pdf [file pharmpract-14-702-suppl.pdf]

**The questionnaire (as translated from Swedish). Possible answers to the multiple-choice questions are given in square brackets after each question.**

| Question                                                                                                                           | Options                                                                                                                                                                                                                                             |
|------------------------------------------------------------------------------------------------------------------------------------|-----------------------------------------------------------------------------------------------------------------------------------------------------------------------------------------------------------------------------------------------------|
| 1. How often do you use any medications?                                                                                           | [Continuously]<br>[Periodically when necessary]<br>[Occasionally when needed]                                                                                                                                                                       |
| 2. Did you read the patient information leaflet for your latest medication?                                                        | [Yes]<br>[No]<br>[Do not remember]                                                                                                                                                                                                                  |
| 3. How often do you read the information on the patient information leaflet?                                                       | [Always]<br>[Sometimes]<br>[Never]                                                                                                                                                                                                                  |
| 4. How would you prefer to receive the information currently provided in the patient information leaflet?                          | [As it is now, in paper form included in the package with the medication]<br>[Have the patient information leaflet printed at the pharmacy]<br>[Read the patient information leaflet electronically on a computer, phone or tablet]<br>[No opinion] |
| 5. How would you feel about reading the patient information leaflet electronically on a computer, phone or tablet?                 | [I am hesitant]<br>[Neutral]<br>[I am positive]                                                                                                                                                                                                     |
| 6. If the patient information leaflet was not included in the medication package, would you ask to get it printed at the pharmacy? | [Yes]<br>[No]<br>[Do not know]                                                                                                                                                                                                                      |
| Gender                                                                                                                             | [Female]<br>[Male]                                                                                                                                                                                                                                  |
| Age (years)                                                                                                                        | [<25]<br>[26-55]<br>[56-85]<br>[>85]                                                                                                                                                                                                                |

## Interview guide for semi-structured interviews (n=15) (as translated from Swedish).

### Questions in the interview guide

---

1. Age and gender
2. Do you use any prescription or non-prescription drugs? If so, how often do you use them?
3. Have you received any new prescription drugs in the past year?
4. Do you help any family member or relative with their medications?
5. How do you obtain information regarding new medications for yourself or a relative?
6. Do you usually read the patient information leaflet for the medication you or a relative use?
7. What makes you decide whether to read the patient information leaflet or not?
8. What information in the patient information leaflet do you usually read?
9. Do you lack any information in the patient information leaflet?
10. What are your perceptions of the patient information leaflet in its current form?
11. Do you perceive any weaknesses or problems with the patient information leaflet in its current form?
12. If questions arise regarding medications you are using, how do you get the information you need?
13. If you want to read information regarding medications online, where do you find it?
14. Did you know that the patient information leaflet is available online on [www.fass.se](http://www.fass.se)? Have you used this website?
15. How would you prefer to receive the information included in the patient information leaflet?
16. How do you feel in general about reading the patient information leaflet electronically, for example on a computer, smart phone or tablet?
17. Which of the following formats for the patient information leaflet would be most practical for you?: (1) As it is now, in paper format included in the medication package, (2) have the patient information leaflet printed at the pharmacy, or (3) access and read the patient information leaflet electronically.
18. Would you ask to get the patient information leaflet printed at the pharmacy if it was not included in the medication package?

*[Information regarding possible benefits associated with an electronic patient information leaflet was provided at this time point.]*

19. After this information, how do you perceive a possible transition towards electronic patient information leaflets? Has your perception changed?
-
